# Supplementary material
Source: PubMed Central journal article supplement (PMC6921501)
Supplement: NIHMS1062874-supplement-1.pdf [file NIHMS1062874-supplement-1.pdf]

## SUPPLEMENTARY MATERIALS

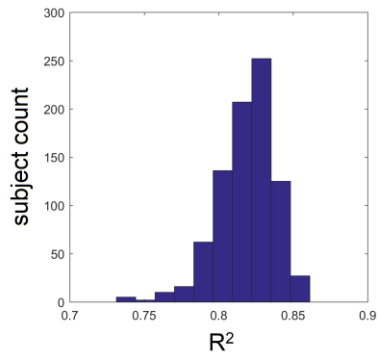

**Fig. S1** The histogram showing the empirical distribution of the goodness-of-fit values of the spatial normalization. The goodness-of-fit was quantified by the  $R^2$  value between each subject's normalized anisotropy map and the template. The distribution shows a skewed function with a tail of lower goodness-of-fit values, which allowed us to examine datasets with potential quality issues.

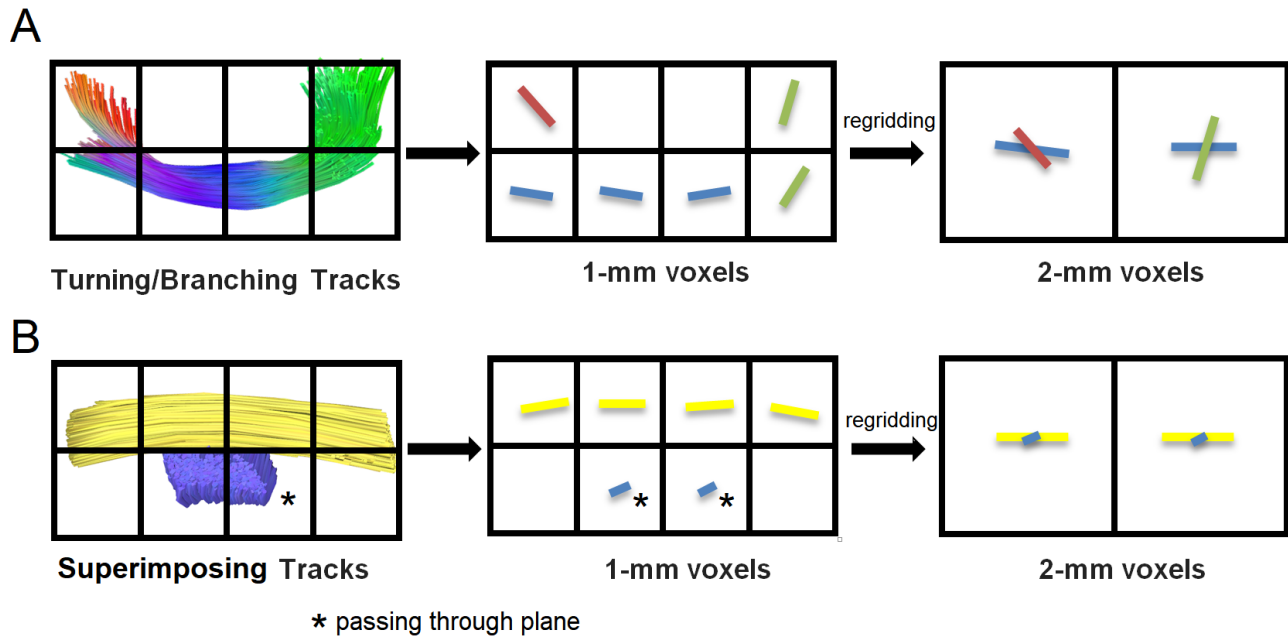

Fig. S2 Spatial resolution affects whether a voxel resolves one or multiple fiber populations. (A) The 1-mm voxels may resolve only one fiber population in branching (red) and turning (green) part of the tracks because the local fiber directions (color bars) do not have a substantial variation that is greater than the angular resolution within the voxel range. In comparison, the 2-mm voxels tend to detect more fiber orientations due to the inclusion of a longer segment of the fibers that lead to a larger difference in the local fiber directions. The larger variation in the local fiber directions can be resolved as multiple fiber populations. (B) The superimposing tracks (yellow) and its nearby through-plane pathways (blue) crossed at the right angle can be independently resolved as single fiber population at 1-mm resolution, but the

2-mm voxels include both of them and appear to have multiple fiber population due to partial volume

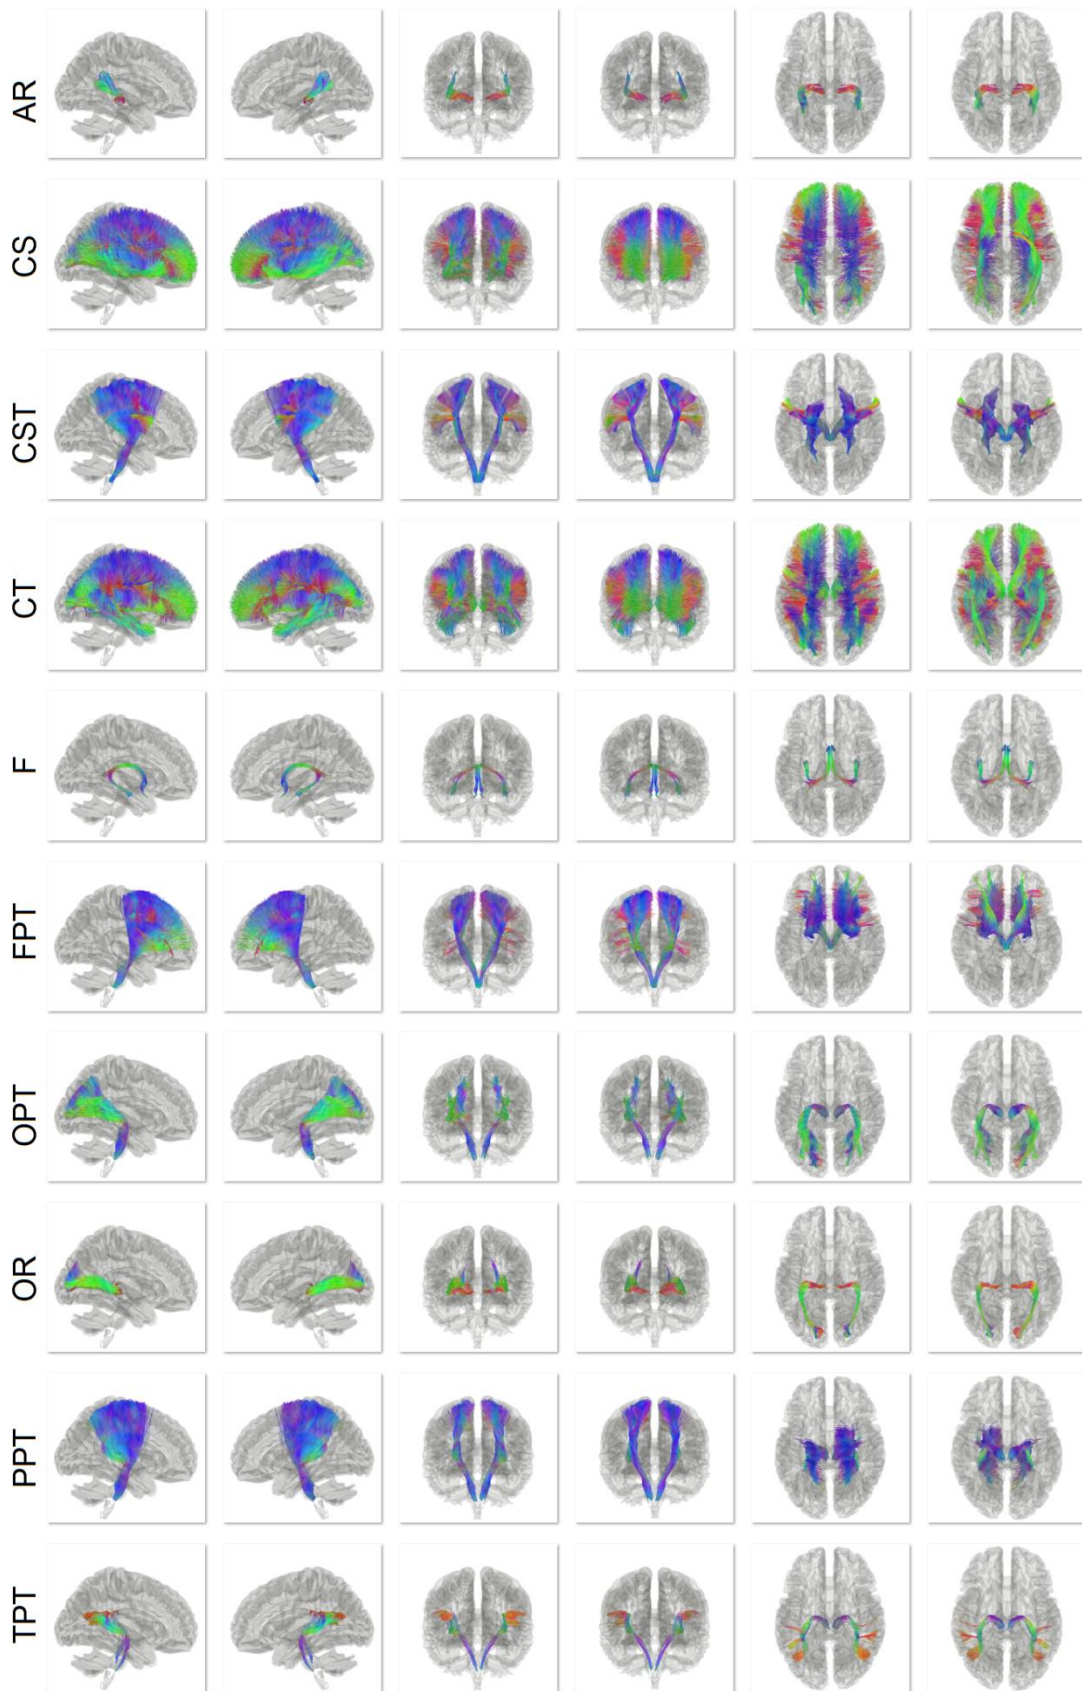

effect.

Fig. S3 The fiber bundles in the projection pathways, including acoustic radiation (AR), corticostriatal pathway (CS), corticospinal tract (CST), corticothalamic pathway (CT), fornix (F), frontopontine tract(FPT), occipitopontine tract (OPT), optic radiation (OR), parietopontine tract (PPT), and temporopontine tract (TPT).

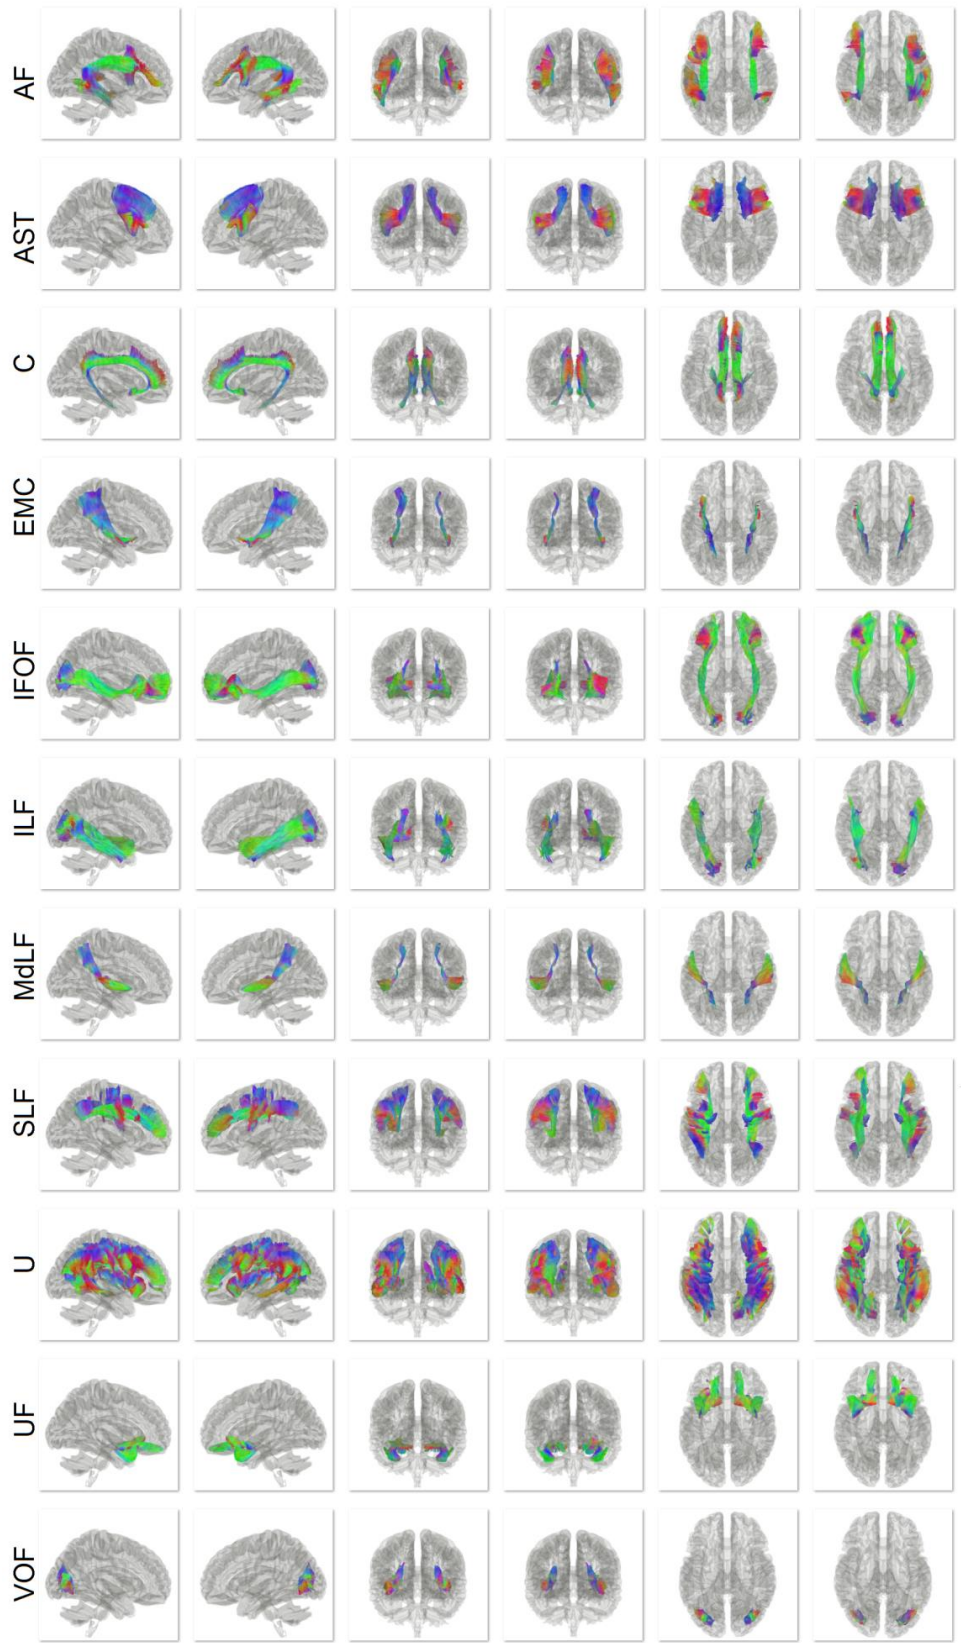

Fig. S4 The fiber bundles in the association pathways, including arcuate fasciculus (AF), frontal aslant tract (AST), cingulum (C), extreme Capsule (EMC), inferior fronto-occipital fasciculus (IFOF), inferior longitudinal fasciculus (ILF), middle longitudinal fasciculus (MdLF), superior longitudinal fasciculus (SLF), U-fibers (U), uncinate fasciculus (UF), and vertical occipital fasciculus (VOF).

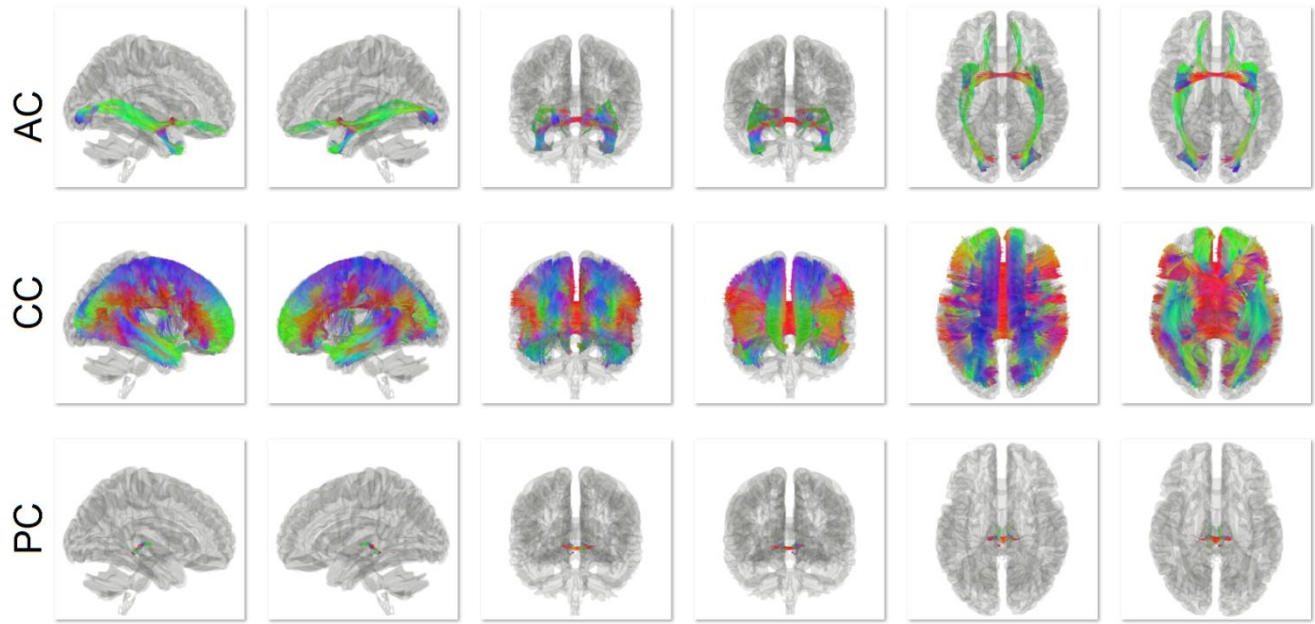

Fig. S5 The fiber bundles in the commissural pathways, including the anterior commissure (AC), corpus callosum (CC), and posterior commissure (PC).



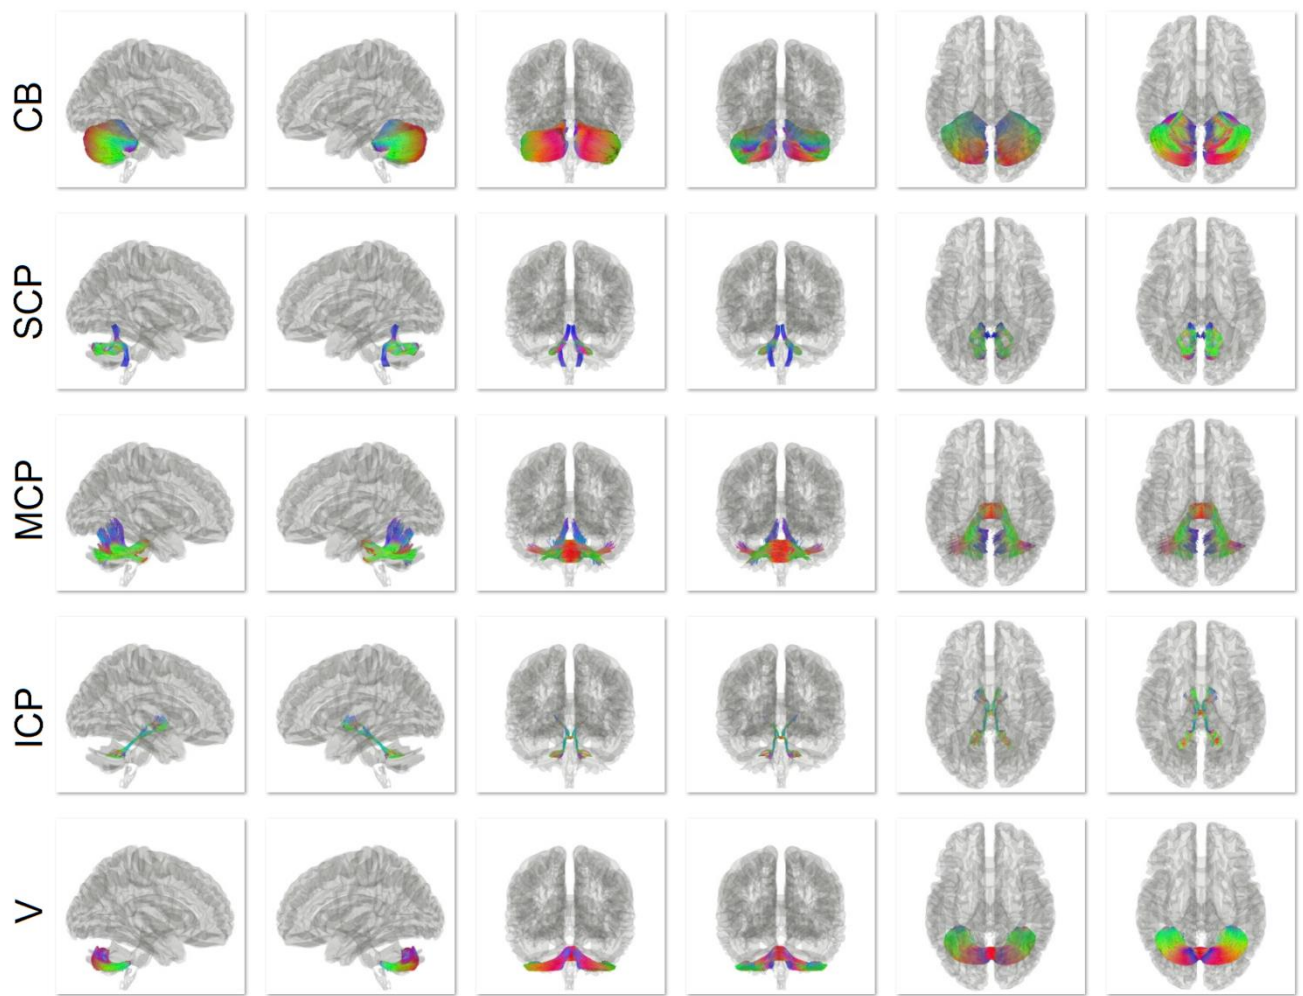

Fig. S6 The fiber bundles in the cerebellar pathways, including the cerebellum (CB), superior cerebellar Peduncle (SCP), middle cerebellar peduncle (MCP), inferior cerebellar peduncle (ICP), and vermis (V)

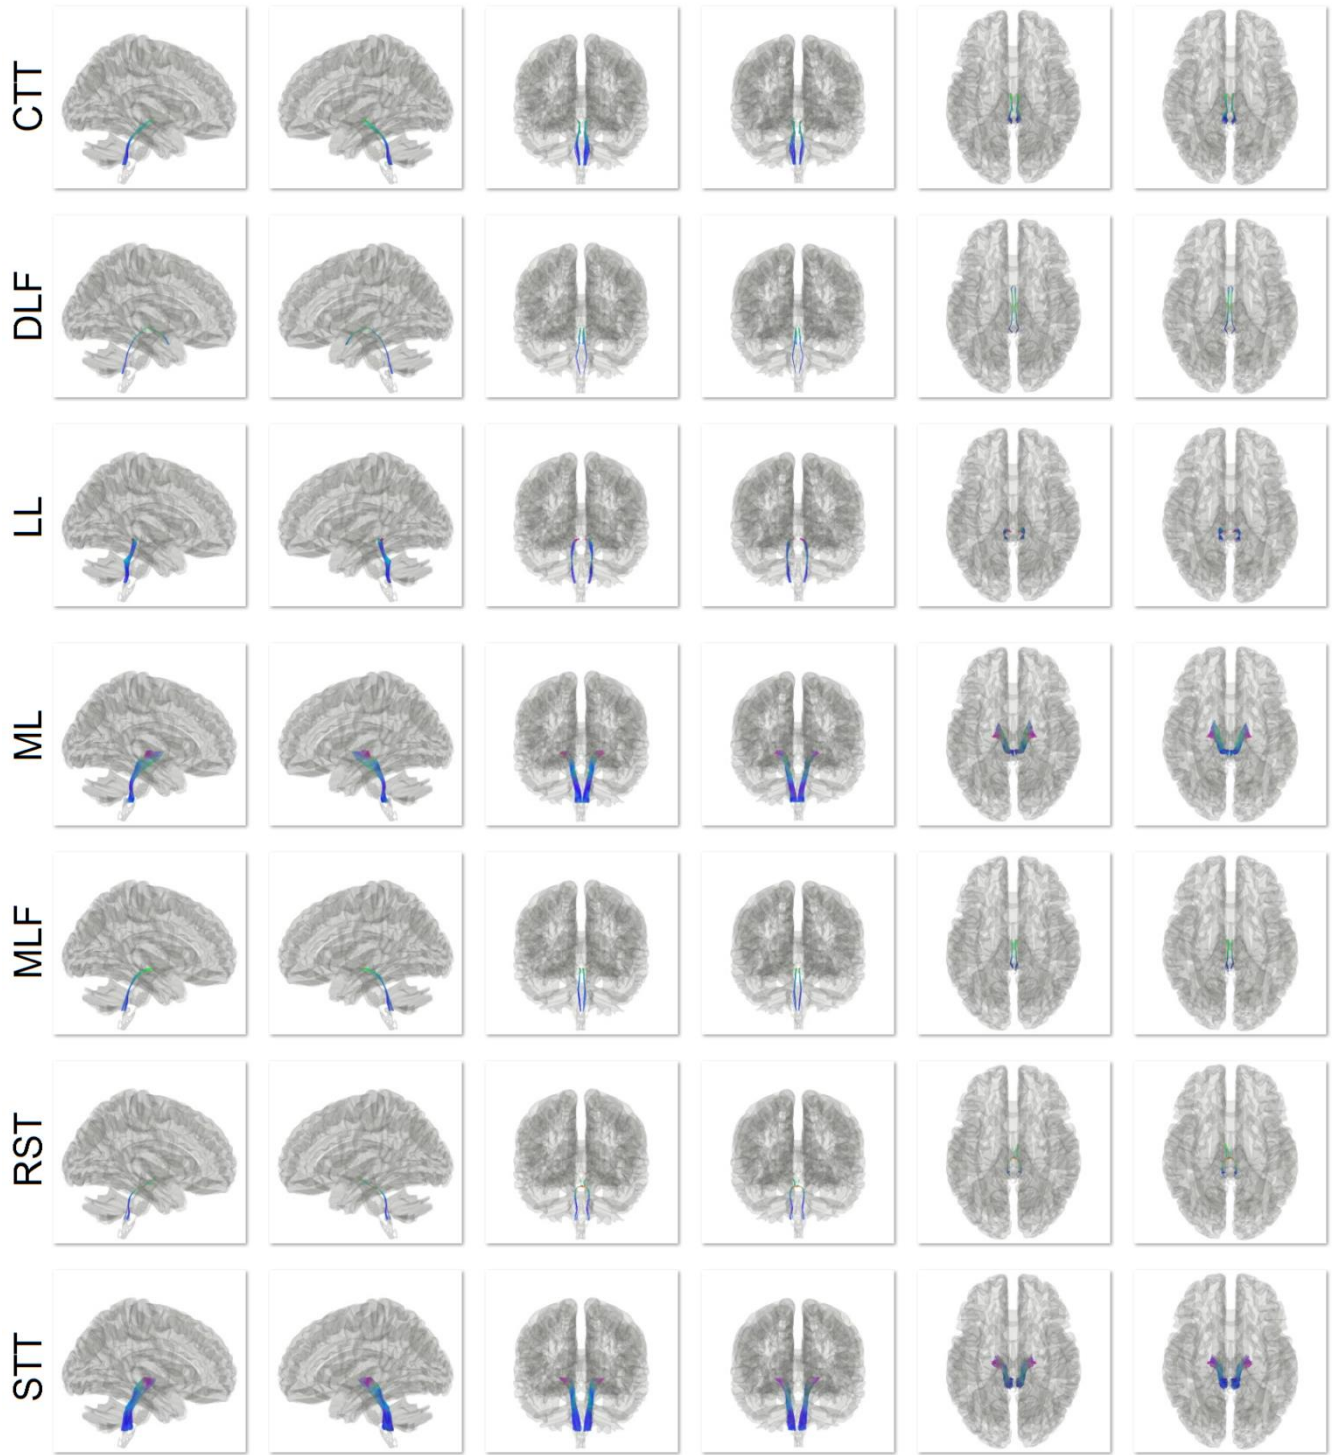

Fig. S7 The fiber bundles in the brainstem, including central tegmental tract (CTT), dorsal longitudinal

fasciculus (DLF), lateral lemniscus (LL), medial lemniscus (ML), medial longitudinal fasciculus (MLF), rubrospinal tract (RST), and spinothalamic tract (STT).

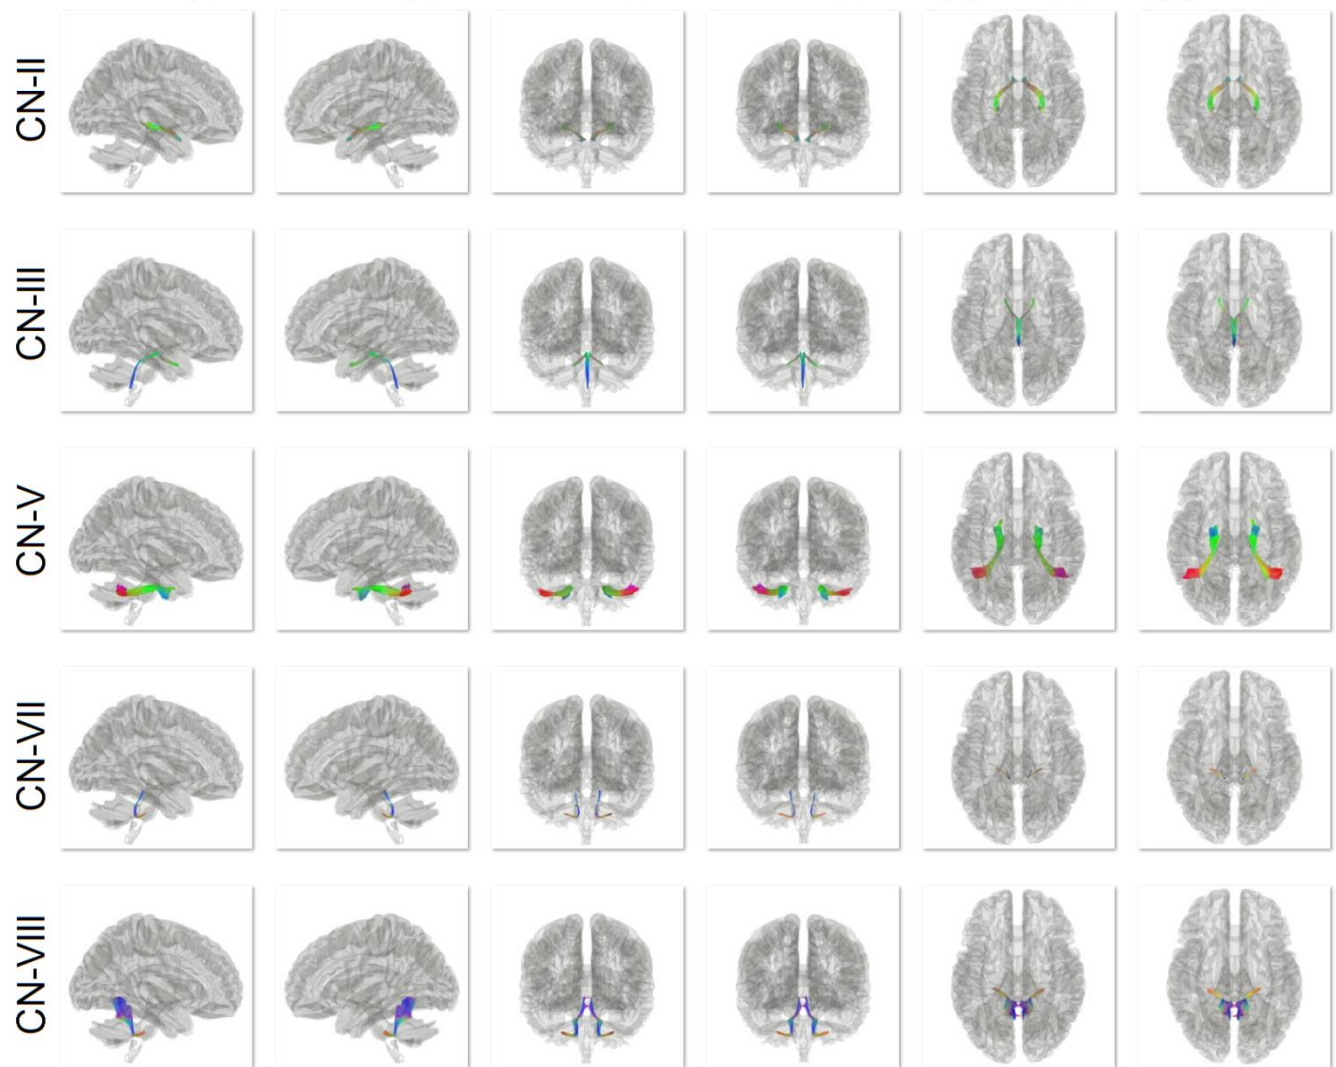

Fig. S8 The cranial nerves included in the atlas, including the visual nerve (CN II), oculomotor (CN III), trigeminal nerve (CN V), facial nerve (CN VII), and auditory nerve (CN VIII).



corresponds to the right hemisphere. The connectogram of the human brain shows a dense network topology between the brain regions, forming a complicated architecture.

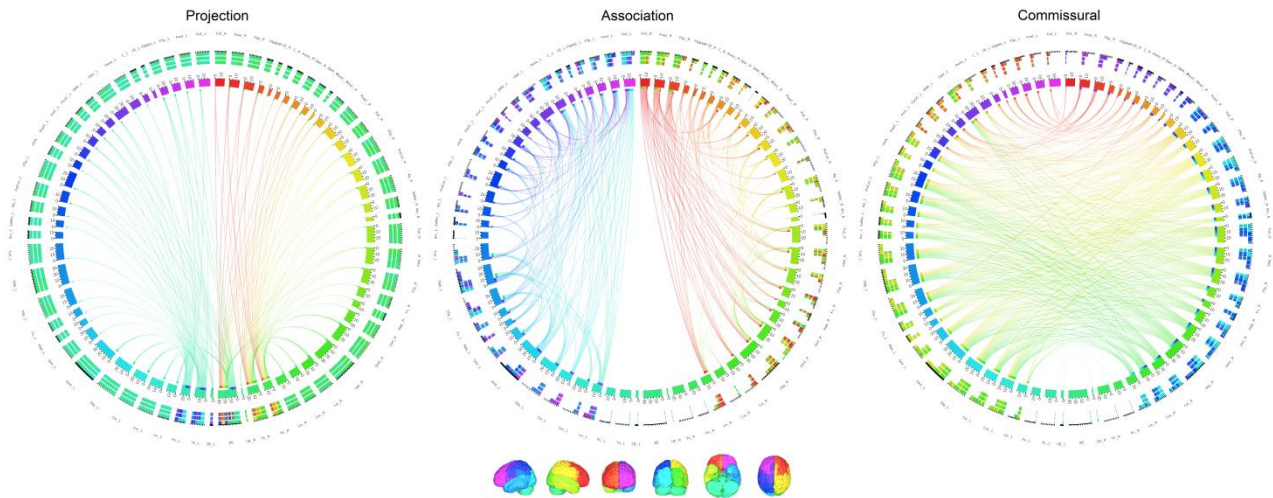

Fig. S10 The second level connectograms of the projection, association, and commissural pathways showing the network topology of each pathway system. The projection pathway forms a hub structure in thalamus, putamen, and brainstem. The association pathway forms numerous clusters within each hemisphere. The commissural pathway provides long ranged communication between the two hemispheres.

## Supplementary Table 1: Abbreviations of the fiber pathways and related references

---

### Projection Pathways

---

|                              |                                                                                                                       |
|------------------------------|-----------------------------------------------------------------------------------------------------------------------|
| Acoustic Radiation (AR)      |                                                                                                                       |
| Corticospinal Tract (CST)    | (Thiebaut de Schotten et al., 2011b)                                                                                  |
| Corticobulbar Tract (CBT)    |                                                                                                                       |
| Corticostriatal Pathway (CS) | (Fernandez-Miranda et al., 2008; Torgerson et al., 2015)                                                              |
| Corticothalamic Pathway (CT) | (Behrens et al., 2003; Wakana et al., 2004)                                                                           |
| Fornix (F)                   | (Catani et al., 2002; Catani and Thiebaut de Schotten, 2008; Thiebaut de Schotten et al., 2011b; Wakana et al., 2004) |
| Optic Radiation (OR)         | (Rubino et al., 2005; Thiebaut de Schotten et al., 2011b)                                                             |
| Frontopontine Tract(FPT)     | (Meola et al., 2016c)                                                                                                 |
| Occipitopontine Tract (OPT)  | (Meola et al., 2016c)                                                                                                 |
| Parietopontine Tract (PPT)   | (Meola et al., 2016c)                                                                                                 |
| Temporopontine Tract (TPT)   | (Meola et al., 2016c)                                                                                                 |

### Association Pathways

---

|                                             |                                                                                                                                                                                                                                                              |
|---------------------------------------------|--------------------------------------------------------------------------------------------------------------------------------------------------------------------------------------------------------------------------------------------------------------|
| Arcuate Fasciculus (AF)                     | (Ayer et al., 2013; Fernandez-Miranda et al., 2015; Rilling et al., 2008; Saur et al., 2008; Thiebaut de Schotten et al., 2012)                                                                                                                              |
| Cingulum (C)                                | (Catani et al., 2002; Catani and Thiebaut de Schotten, 2008; Thiebaut de Schotten et al., 2012; Thiebaut de Schotten et al., 2011b; Wakana et al., 2004)                                                                                                     |
| Extreme Capsule (EMC)                       | (Makris and Pandya, 2009)                                                                                                                                                                                                                                    |
| Frontal Aslant Tract (FAT)                  | (Catani et al., 2012; Thiebaut de Schotten et al., 2012)                                                                                                                                                                                                     |
| Inferior Fronto Occipital Fasciculus (IFOF) | (Catani et al., 2002; Forkel et al., 2014; Makris et al., 2007; Meola et al., 2015; Schmahmann and Pandya, 2007; Thiebaut de Schotten et al., 2012; Thiebaut de Schotten et al., 2011b; Wakana et al., 2004)                                                 |
| Inferior Longitudinal Fasciculus (ILF)      | (Amemiya and Naito, 2016; Catani et al., 2002; Catani and Thiebaut de Schotten, 2008; Grossi et al., 2014; Koldewyn et al., 2014; Latini, 2015; Mandonnet et al., 2007; Thiebaut de Schotten et al., 2011b; Tusa and Ungerleider, 1985; Wakana et al., 2004) |
| Middle Longitudinal Fasciculus (MdLF)       | (Makris et al., 2009; Makris et al., 2013; Wang et al., 2013)                                                                                                                                                                                                |
| Superior Longitudinal                       | (Budisavljevic et al., 2016; Karlsgodt et al., 2008; Makris et al.,                                                                                                                                                                                          |



|                                     |                                                                                                                                                        |
|-------------------------------------|--------------------------------------------------------------------------------------------------------------------------------------------------------|
| Fasciculus (SLF)                    | 2005; Thiebaut de Schotten et al., 2011a; Wakana et al., 2004; Wang et al., 2016)                                                                      |
| U-fiber (U)                         |                                                                                                                                                        |
| Uncinate Fasciculus (UF)            | (Catani and Thiebaut de Schotten, 2008; Leng et al., 2016; Thiebaut de Schotten et al., 2012; Thiebaut de Schotten et al., 2011b; Wakana et al., 2004) |
| Vertical Occipital Fasciculus (VOF) | (Takemura et al., 2016; Yeatman et al., 2014)                                                                                                          |

---

### Commissural Pathways

|                           |                                                                                                                      |
|---------------------------|----------------------------------------------------------------------------------------------------------------------|
| Anterior Commissure (AC)  | (Catani et al., 2002; Catani and Thiebaut de Schotten, 2008; Thiebaut de Schotten et al., 2011b)                     |
| Corpus Callosum (CC)      | (Catani and Thiebaut de Schotten, 2008; Huang et al., 2005; Thiebaut de Schotten et al., 2011b; Wakana et al., 2004) |
| Posterior Commissure (PC) | (Keene, 1938)                                                                                                        |

---

### Cerebellum

|                                    |                                                                  |
|------------------------------------|------------------------------------------------------------------|
| Cerebellum (CB)                    | (Catani and Thiebaut de Schotten, 2008; Dell'Acqua et al., 2013; |
| Superior Cerebellar Peduncle (SCP) | Meola et al., 2016a; Meola et al., 2016c; Wakana et al., 2004)   |
| Middle Cerebellar Peduncle (MCP)   |                                                                  |
| Inferior Cerebellar Peduncle (ICP) |                                                                  |
| Vermis (V)                         |                                                                  |

---

### Brainstem

|                                      |                       |
|--------------------------------------|-----------------------|
| Central Tegmental Tract (CTT)        | (Meola et al., 2016c) |
| Dorsal Longitudinal Fasciculus (DLF) |                       |
| Lateral Lemniscus (LL)               |                       |
| Medial Lemniscus (ML)                |                       |
| Medial Longitudinal                  |                       |

---

---

Fasciculus (MLF)  
Rubrospinal Tract (RST)  
Spinothalamic Tract (STT)

---

**Cranial Nerves** (Yoshino et al., 2016b)

---

---

**Related Reference:**

- Amemiya, K., Naito, E., 2016. Importance of human right inferior frontoparietal network connected by inferior branch of superior longitudinal fasciculus tract in corporeal awareness of kinesthetic illusory movement. *Cortex* 78, 15-30.
- Axer, H., Klingner, C.M., Prescher, A., 2013. Fiber anatomy of dorsal and ventral language streams. *Brain Lang* 127, 192-204.
- Behrens, T.E., Johansen-Berg, H., Woolrich, M.W., Smith, S.M., Wheeler-Kingshott, C.A., Boulby, P.A., Barker, G.J., Sillery, E.L., Sheehan, K., Ciccarelli, O., Thompson, A.J., Brady, J.M., Matthews, P.M., 2003. Non-invasive mapping of connections between human thalamus and cortex using diffusion imaging. *Nat Neurosci* 6, 750-757.
- Budisavljevic, S., Dell'Acqua, F., Zanatto, D., Begliomini, C., Miotto, D., Motta, R., Castiello, U., 2016. Asymmetry and Structure of the Fronto-Parietal Networks Underlie Visuomotor Processing in Humans. *Cereb Cortex*.
- Catani, M., Dell'acqua, F., Vergani, F., Malik, F., Hodge, H., Roy, P., Valabregue, R., Thiebaut de Schotten, M., 2012. Short frontal lobe connections of the human brain. *Cortex* 48, 273-291.
- Catani, M., Howard, R.J., Pajevic, S., Jones, D.K., 2002. Virtual in vivo interactive dissection of white matter fasciculi in the human brain. *Neuroimage* 17, 77-94.
- Catani, M., Thiebaut de Schotten, M., 2008. A diffusion tensor imaging tractography atlas for virtual in vivo dissections. *Cortex* 44, 1105-1132.
- Dell'Acqua, F., Bodi, I., Slater, D., Catani, M., Modo, M., 2013. MR diffusion histology and micro-tractography reveal mesoscale features of the human cerebellum. *Cerebellum* 12, 923-931.
- Fernandez-Miranda, J.C., Rhoton, A.L., Jr., Kakizawa, Y., Choi, C., Alvarez-Linera, J., 2008. The claustrum and its projection system in the human brain: a microsurgical and tractographic anatomical study. *J Neurosurg* 108, 764-774.
- Fernandez-Miranda, J.C., Wang, Y., Pathak, S., Stefaneau, L., Verstynen, T., Yeh, F.C., 2015. Asymmetry, connectivity, and segmentation of the arcuate fascicle in the human brain. *Brain Struct Funct* 220, 1665-1680.
- Forkel, S.J., Thiebaut de Schotten, M., Kawadler, J.M., Dell'Acqua, F., Danek, A., Catani, M., 2014. The anatomy of fronto-occipital connections from early blunt dissections to contemporary

---

tractography. *Cortex* 56, 73-84.

- Grossi, D., Soricelli, A., Ponari, M., Salvatore, E., Quarantelli, M., Prinster, A., Trojano, L., 2014. Structural connectivity in a single case of progressive prosopagnosia: the role of the right inferior longitudinal fasciculus. *Cortex* 56, 111-120.
- Huang, H., Zhang, J., Jiang, H., Wakana, S., Poetscher, L., Miller, M.I., van Zijl, P.C., Hillis, A.E., Wytik, R., Mori, S., 2005. DTI tractography based parcellation of white matter: application to the mid-sagittal morphology of corpus callosum. *Neuroimage* 26, 195-205.
- Karlsgodt, K.H., van Erp, T.G., Poldrack, R.A., Bearden, C.E., Nuechterlein, K.H., Cannon, T.D., 2008. Diffusion tensor imaging of the superior longitudinal fasciculus and working memory in recent-onset schizophrenia. *Biol Psychiatry* 63, 512-518.
- Keene, M.F., 1938. The Connexions of the Posterior Commissure: A Study of its Development and Myelination in the Human Foetus and Young Infant, of its Phylogenetic Development, and of Degenerative Changes resulting from certain Experimental Lesions. *J Anat* 72, 488-501.
- Koldewyn, K., Yendiki, A., Weigelt, S., Gweon, H., Julian, J., Richardson, H., Malloy, C., Saxe, R., Fischl, B., Kanwisher, N., 2014. Differences in the right inferior longitudinal fasciculus but no general disruption of white matter tracts in children with autism spectrum disorder. *Proc Natl Acad Sci U S A* 111, 1981-1986.
- Latini, F., 2015. New insights in the limbic modulation of visual inputs: the role of the inferior longitudinal fasciculus and the Li-Am bundle. *Neurosurg Rev* 38, 179-189; discussion 189-190.
- Leng, B., Han, S., Bao, Y., Zhang, H., Wang, Y., Wu, Y., Wang, Y., 2016. The uncinate fasciculus as observed using diffusion spectrum imaging in the human brain. *Neuroradiology* 58, 595-606.
- Makris, N., Kennedy, D.N., McInerney, S., Sorensen, A.G., Wang, R., Caviness, V.S., Jr., Pandya, D.N., 2005. Segmentation of subcomponents within the superior longitudinal fascicle in humans: a quantitative, in vivo, DT-MRI study. *Cereb Cortex* 15, 854-869.
- Makris, N., Pandya, D.N., 2009. The extreme capsule in humans and rethinking of the language circuitry. *Brain Struct Funct* 213, 343-358.
- Makris, N., Papadimitriou, G.M., Kaiser, J.R., Sorg, S., Kennedy, D.N., Pandya, D.N., 2009. Delineation of the middle longitudinal fascicle in humans: a quantitative, in vivo, DT-MRI study. *Cereb Cortex* 19, 777-785.
- Makris, N., Papadimitriou, G.M., Sorg, S., Kennedy, D.N., Caviness, V.S., Pandya, D.N., 2007. The occipitofrontal fascicle in humans: a quantitative, in vivo, DT-MRI study. *Neuroimage* 37, 1100-1111.
- Makris, N., Preti, M.G., Asami, T., Pelavin, P., Campbell, B., Papadimitriou, G.M., Kaiser, J.,

---

Baselli, G., Westin, C.F., Shenton, M.E., Kubicki, M., 2013. Human middle longitudinal fascicle: variations in patterns of anatomical connections. *Brain Struct Funct* 218, 951-968.

- Mandonnet, E., Nouet, A., Gatignol, P., Capelle, L., Duffau, H., 2007. Does the left inferior longitudinal fasciculus play a role in language? A brain stimulation study. *Brain* 130, 623-629.
- Meola, A., Comert, A., Yeh, F.C., Sivakanthan, S., Fernandez-Miranda, J.C., 2016a. The nondecussating pathway of the dentatorubrothalamic tract in humans: human connectome-based tractographic study and microdissection validation. *J Neurosurg* 124, 1406-1412.
- Meola, A., Comert, A., Yeh, F.C., Stefaneanu, L., Fernandez-Miranda, J.C., 2015. The controversial existence of the human superior fronto-occipital fasciculus: Connectome-based tractographic study with microdissection validation. *Hum Brain Mapp* 36, 4964-4971.
- Meola, A., Yeh, F.C., Fellows-Mayle, W., Weed, J., Fernandez-Miranda, J.C., 2016b. Human Connectome-Based Tractographic Atlas of the Brainstem Connections and Surgical Approaches. *Neurosurgery*.
- Rilling, J.K., Glasser, M.F., Preuss, T.M., Ma, X., Zhao, T., Hu, X., Behrens, T.E., 2008. The evolution of the arcuate fasciculus revealed with comparative DTI. *Nat Neurosci* 11, 426-428.
- Rubino, P.A., Rhoton, A.L., Jr., Tong, X., Oliveira, E., 2005. Three-dimensional relationships of the optic radiation. *Neurosurgery* 57, 219-227; discussion 219-227.
- Saur, D., Kreher, B.W., Schnell, S., Kummerer, D., Kellmeyer, P., Vry, M.S., Umarova, R., Musso, M., Glauche, V., Abel, S., Huber, W., Rijntjes, M., Hennig, J., Weiller, C., 2008. Ventral and dorsal pathways for language. *Proc Natl Acad Sci U S A* 105, 18035-18040.
- Schmahmann, J.D., Pandya, D.N., 2007. The complex history of the fronto-occipital fasciculus. *J Hist Neurosci* 16, 362-377.
- Takemura, H., Rokem, A., Winawer, J., Yeatman, J.D., Wandell, B.A., Pestilli, F., 2016. A Major Human White Matter Pathway Between Dorsal and Ventral Visual Cortex. *Cereb Cortex* 26, 2205-2214.
- Thiebaut de Schotten, M., Dell'Acqua, F., Forkel, S.J., Simmons, A., Vergani, F., Murphy, D.G., Catani, M., 2011a. A lateralized brain network for visuospatial attention. *Nat Neurosci* 14, 1245-1246.
- Thiebaut de Schotten, M., Dell'Acqua, F., Valabregue, R., Catani, M., 2012. Monkey to human comparative anatomy of the frontal lobe association tracts. *Cortex* 48, 82-96.
- Thiebaut de Schotten, M., Ffytche, D.H., Bizzi, A., Dell'Acqua, F., Allin, M., Walshe, M., Murray, R., Williams, S.C., Murphy, D.G., Catani, M., 2011b. Atlasing location, asymmetry and inter-subject variability of white matter tracts in the human brain with MR diffusion tractography. *Neuroimage* 54, 49-59.

- 
- Torgerson, C.M., Irimia, A., Goh, S.Y., Van Horn, J.D., 2015. The DTI connectivity of the human claustrum. *Hum Brain Mapp* 36, 827-838.
  - Tusa, R.J., Ungerleider, L.G., 1985. The inferior longitudinal fasciculus: a reexamination in humans and monkeys. *Ann Neurol* 18, 583-591.
  - Wakana, S., Jiang, H., Nagae-Poetscher, L.M., van Zijl, P.C., Mori, S., 2004. Fiber tract-based atlas of human white matter anatomy. *Radiology* 230, 77-87.
  - Wang, X., Pathak, S., Stefanescu, L., Yeh, F.C., Li, S., Fernandez-Miranda, J.C., 2016. Subcomponents and connectivity of the superior longitudinal fasciculus in the human brain. *Brain Struct Funct* 221, 2075-2092.
  - Wang, Y., Fernandez-Miranda, J.C., Verstynen, T., Pathak, S., Schneider, W., Yeh, F.C., 2013. Rethinking the role of the middle longitudinal fascicle in language and auditory pathways. *Cereb Cortex* 23, 2347-2356.
  - Yeatman, J.D., Weiner, K.S., Pestilli, F., Rokem, A., Mezer, A., Wandell, B.A., 2014. The vertical occipital fasciculus: a century of controversy resolved by in vivo measurements. *Proc Natl Acad Sci U S A* 111, E5214-5223.
  - Yoshino, M., Abhinav, K., Yeh, F.C., Panesar, S., Fernandes, D., Pathak, S., Gardner, P.A., Fernandez-Miranda, J.C., 2016. Visualization of Cranial Nerves Using High-Definition Fiber Tractography. *Neurosurgery*.

**Table S2 Abbreviations of the brain regions**

---

|          |                              |
|----------|------------------------------|
| Finf_L   | Frontal Inferior Left        |
| Fmid_L   | Frontal Middle Left          |
| FSp_L    | Frontal Superior Left        |
| FSpMd_L  | Frontal Superior Medial Left |
| Of_L     | Olfactory Left               |
| C_L      | Cingulum Left                |
| Insula_L | Insula Left                  |
| Oper_L   | Oper Left                    |
| SMA_L    | Supp Motor Area Left         |
| ParaC_L  | Paracentral Left             |
| PreC_L   | Precentral Left              |
| PostC_L  | Postcentral Left             |
| PInfl    | Parietal Inferior Left       |
| PSp_L    | Parietal Superior Left       |
| PreCun_L | Precuneus Left               |
| Ag_L     | Angular Left                 |
| SpMar_L  | SupraMarginal Left           |
| Am_L     | Amygdala Left                |
| Tinf_L   | Temporal Inferior Left       |
| TMd_L    | Temporal Middle Left         |
| TSp_L    | Temporal Superior Left       |
| Fu_L     | Fusiform Left                |
| Hipp_L   | Hippocampus Left             |
| Oinf_L   | Occipital Inferior Left      |
| Omd_L    | Occipital Middle Left        |
| Osp_L    | Occipital Superior Left      |
| Cal_L    | Calcarine Left               |
| Cun_L    | Cuneus Left                  |
| Lin_L    | Lingual Left                 |
| Pu_L     | Putamen Left                 |
| Th_L     | Thalamus Left                |
| CB_L     | Cerebelum Left               |
| BS       | BrainStem                    |

|          |                               |
|----------|-------------------------------|
| CB_R     | Cerebelum Right               |
| Th_R     | Thalamus Right                |
| Pu_R     | Putamen Right                 |
| Lin_R    | Lingual Right                 |
| Cun_R    | Cuneus Right                  |
| Cal_R    | Calcarine Right               |
| Osp_R    | Occipital Superior Right      |
| Omd_R    | Occipital Middle Right        |
| Oinf_R   | Occipital Inferior Right      |
| Hipp_R   | Hippocampus Right             |
| Fu_R     | Fusiform Right                |
| TSp_R    | Temporal Superior Right       |
| TMd_R    | Temporal Middle Right         |
| Tinf_R   | Temporal Inferior Right       |
| Am_R     | Amygdala Right                |
| SpMar_R  | SupraMarginal Right           |
| Ag_R     | Angular Right                 |
| PreCun_R | Precuneus Right               |
| PSp_R    | Parietal Superior Right       |
| Pinf_R   | Parietal Inferior Right       |
| PostC_R  | Postcentral Right             |
| PreC_R   | Precentral Right              |
| ParaC_R  | Paracentral Right             |
| SMA_R    | Supp Motor Area Right         |
| Oper_R   | Oper Right                    |
| Insula_R | Insula Right                  |
| C_R      | Cingulum Right                |
| Of_R     | Olfactory Right               |
| FSpMdR   | Frontal Superior_Medial Right |
| FSp_R    | Frontal Superior Right        |
| Fmid_R   | Frontal Middle Right          |
| Finf_R   | Frontal Inferior Right        |
